# Supplementary material for: New Methylcitrate Synthase Inhibitor Induces Proteolysis, Lipid Degradation and Pyruvate Excretion in Paracoccidioides brasiliensis
Source: MDPI journal article supplement (doi:10.3390/jof9010108), 2023-01-13
Supplement: s1 [file s1]

**Table S1. *P. brasiliensis* proteins up-regulated after exposure to ZINCO8964784.**

| <b>Accession number</b>                                | <b>Protein description</b>                         | <b>Fold change</b> |
|--------------------------------------------------------|----------------------------------------------------|--------------------|
| <b>1. Metabolism</b>                                   |                                                    |                    |
| <b>1.1 Amino acid metabolism</b>                       |                                                    |                    |
| PADG_04689                                             | Arginine-requiring protein 2                       | *                  |
| PADG_01305                                             | Arginosuccinase                                    | *                  |
| PADG_08406                                             | O-acetylhomoserine (Thiol)-lyase                   | 1,59115327034609   |
| PADG_03522                                             | S-methyl-5'-thioadenosine phosphorylase            | 2,32667694163372   |
| PADG_02726                                             | Cysteine synthase                                  | 2,9376962693129    |
| PADG_01418                                             | Cysteine dioxygenase                               | 4,04033613445378   |
| PADG_02914                                             | Glycine cleavage system                            | 2,94730228383365   |
| PADG_05085                                             | 1-pyrroline-5-carboxylate dehydrogenase            | 2,45474443678813   |
| PADG_08466                                             | Homogentisate 1,2-dioxygenase                      | 1,86643065078536   |
| PADG_08265                                             | Methionine aminopeptidase 2                        | 1,849525358        |
| PADG_07460                                             | Vacuolar aminopeptidase                            | 1,88366292535186   |
| PADG_04167                                             | Aspartyl aminopeptidase                            | 1,61837358773873   |
| PADG_03595                                             | Xaa-Pro aminopeptidase P                           | 1,75478054715039   |
| PADG_06314                                             | Carboxypeptidase Y homolog A                       | 2,75105442960618   |
| PADG_01963                                             | Glycine cleavage system H protein                  | *                  |
| PADG_06490                                             | Formamidase                                        | 2,94183014446193   |
| <b>1.2 Lipid, fatty acid and isoprenoid metabolism</b> |                                                    |                    |
| PADG_03176                                             | Phosphatidylglycerol/phosphatidylinositol transfer | 1,62049291803496   |
| PADG_01209                                             | enoyl-CoA hydratase                                | 1,67712136842871   |
| PADG_01687                                             | 3-ketoacyl-CoA thiolase                            | 1,74358133335194   |
| PADG_01228                                             | 3-hydroxybutyryl-CoA dehydrogenase                 | 2,49435486248268   |
| PADG_01233                                             | 4HBT domain-containing protein                     | 2,58440409683426   |
| <b>1.3 C- compound metabolism</b>                      |                                                    |                    |
| PADG_06202                                             | NodB homology domain-containing protein            | 3,13080495356037   |
| PADG_01265                                             | Mesaconyl-C4 CoA hydratase                         | 4,83296880395994   |
| PADG_05063                                             | $\alpha$ -1,3/1,6-mannosyltransferase ALG2         | *                  |
| PADG_08402                                             | 27 kDa antigen                                     | 4,18535639725619   |
| <b>2. Energy</b>                                       |                                                    |                    |
| <b>2.1 Glycolysis and gluconeogenesis</b>              |                                                    |                    |
| PADG_05109                                             | Phosphoglycerate mutase                            | 1,56001373469154   |
| PADG_01706                                             | Fructose-bisphosphatase                            | 2,34766742463141   |
| PADG_02411                                             | Glyceraldehyde-3-phosphate dehydrogenase           | 2,75158074688034   |
| <b>2.2 Pentose-phosphate pathway</b>                   |                                                    |                    |
| PADG_04989                                             | D-ribose-5-phosphate ketol-isomerase               | 4,71979277769313   |
| <b>2.3 Tricarboxylic-acid pathway</b>                  |                                                    |                    |
| PADG_08119                                             | Fumarate hydratase                                 | 1,59699059226      |
| PADG_04710                                             | Citrate synthase                                   | 1,84448668519681   |
| PADG_06494                                             | Dihydrolipoyl dehydrogenase                        | 2,11324750806761   |
| PADG_08013                                             | Succinate dehydrogenase iron-sulfur subunit        | *                  |
| <b>2.4 Electron transport chain</b>                    |                                                    |                    |
| PADG_06600                                             | Cytochrome b5 heme-binding                         | *                  |
| PADG_06978                                             | Cytochrome c                                       | *                  |

| <b>3. Protein metabolism</b>                 |                                                 |                  |
|----------------------------------------------|-------------------------------------------------|------------------|
| PADG_07190                                   | 20S proteasome subunit alpha 2                  | 1,5626828857261  |
| PADG_08442                                   | Proteasome subunit alpha type                   | 1,70018643868519 |
| PADG_04587                                   | Glutathione peroxidase                          | 1,70788200046094 |
| PADG_08087                                   | Proteasome subunit beta                         | 1,77001221853727 |
| PADG_03727                                   | Proteasome endopeptidase complex                | 10,3546406644998 |
| PADG_03967                                   | proteasome core particle subunit beta 6         | 2,10382198476063 |
| PADG_06546                                   | Puromycin-sensitive aminopeptidase              | 2,57304933362639 |
| PADG_06290                                   | Proteasome $\alpha$ 1 domain-containing protein | 2,65879125066687 |
| PADG_01605                                   | Polyubiquitin                                   | 20,3029191423405 |
| PADG_01605                                   | Polyubiquitin                                   | 20,3029191423405 |
| PADG_07422                                   | Serine proteinase                               | 3,56822851493102 |
| PADG_08369                                   | Hsp60                                           | 2,68691506372572 |
| PADG_04062                                   | Hsp90                                           | 8,08787148594377 |
| PADG_08587                                   | Peptidylprolyl isomerase                        | 3,19823008849557 |
| <b>4. Cell rescue, defense and virulence</b> |                                                 |                  |
| PADG_07418                                   | Superoxide dismutase Cu-Zn                      | 2,19821988216121 |
| PADG_01755                                   | Superoxide dismutase Cu-Zn                      | 1,66673379912934 |
| PADG_01954                                   | Superoxide dismutase, divalent metal cation     | 5,02616449606946 |
| PADG_02764                                   | Thioredoxin                                     | 1,74549592870424 |
| PADG_04636                                   | DLH domain-containing protein                   | 1,58735339039221 |
| PADG_01857                                   | DLH domain-containing protein                   | 7,3285015060241  |
| <b>5. Translation</b>                        |                                                 |                  |
| PADG_03440                                   | Prolyl-tRNA synthetase                          | 2,74634942709436 |
| PADG_01387                                   | 60S ribosomal protein L7                        | 3,35629829624802 |
| PADG_05883                                   | 60S ribosomal protein L25                       | 1,85129358830146 |
| <b>6. Biogenesis of cellular components</b>  |                                                 |                  |
| PADG_00995                                   | Ubiquitin-40S ribosomal protein S27a            | 3,89706544243406 |
| PADG_07891                                   | Ubiquitin-60S ribosomal protein L40             | 56,3684516880093 |
| <b>7. Transport routes</b>                   |                                                 |                  |
| PADG_11111                                   | NTF2 domain-containing protein                  | 2,10378973395782 |
| PADG_12077                                   | Actin                                           | 2,69498705577783 |
| PADG_00852                                   | Aldolase_II domain-containing protein           | *                |
| <b>8. Hypothetical protein</b>               |                                                 |                  |
| PADG_01692                                   | Hypothetical protein                            | 37,5551181102362 |
| PADG_08212                                   | Hypothetical protein                            | 1,59222392377063 |
| PADG_05703                                   | Hypothetical protein                            | 1,62044253998744 |
| PADG_00140                                   | Hypothetical protein                            | 2,02050861361772 |
| PADG_01857                                   | Hypothetical protein                            | 7,15993930197269 |

\*Indicates that the protein is expressed specifically in the up-regulation condition

**Table S2. *P. brasilensis* proteins down-regulated after exposure to ZINCO8964784.**

| <b>Accession number</b>                                | <b>Protein description</b>                           | <b>Fold change</b> |
|--------------------------------------------------------|------------------------------------------------------|--------------------|
| <b>1. Metabolism</b>                                   |                                                      |                    |
| <b>1.1 Amino acid metabolism</b>                       |                                                      |                    |
| PADG_01404                                             | Aspartate aminotransferase                           | 0,612709226522582  |
| PADG_01665                                             | Aminotran_1_2 domain-containing protein              | 0,630313152400835  |
| PADG_11902                                             | Acetylornithine deacetylase                          | *                  |
| PADG_07029                                             | Acetylornithine transaminase                         | *                  |
| PADG_05301                                             | Cystathionine beta-synthase                          | *                  |
| PADG_01928                                             | S-adenosylmethionine synthase                        | 0,504704301075269  |
| PADG_02719                                             | Methionine adenosyltransferase 2 subunit beta        | *                  |
| PADG_01566                                             | Methylthioribulose-1-phosphate dehydratase           | *                  |
| PADG_06252                                             | 1,2-dihydroxy-3-keto-5-methylthiopentene dioxygenase | *                  |
| PADG_08376                                             | Aspartate-semialdehyde dehydrogenase                 | *                  |
| PADG_05277                                             | Serine hydroxymethyltransferase                      | *                  |
| PADG_08304                                             | Acetohydroxy-acid synthase small subunit             | *                  |
| PADG_03167                                             | 3-isopropylmalate dehydratase                        | *                  |
| PADG_01718                                             | Saccharopine dehydrogenase                           | 0,389944775789706  |
| PADG_01328                                             | Ornithine aminotransferase                           | *                  |
| PADG_05058                                             | Chorismate mutase                                    | *                  |
| PADG_04522                                             | Homoserine kinase                                    | 0,477443232969891  |
| PADG_02777                                             | Threonine synthase                                   | *                  |
| PADG_07274                                             | Multifunctional tryptophan biosynthesis protein      | 0,462079733527636  |
| PADG_04854                                             | Anthranilate synthase                                | *                  |
| PADG_06429                                             | Ketol-acid reductoisomerase, mitochondrial           | 0,23989388812812   |
| PADG_03020                                             | Alanine-glyoxylate transaminase                      | *                  |
| PADG_12141                                             | Clavamate synthase                                   | *                  |
| PADG_06319                                             | Glutamate decarboxylase                              | *                  |
| PADG_00971                                             | Glutamate decarboxylase                              | *                  |
| PADG_03686                                             | Aspartate aminotransferase                           | *                  |
| PADG_03825                                             | NAD-specific glutamate dehydrogenase                 | *                  |
| PADG_00405                                             | Choline dehydrogenase                                | *                  |
| PADG_12025                                             | Glutaryl-CoA dehydrogenase                           | 0,38543066129273   |
| PADG_06876                                             | 3-hydroxyisobutyryl-CoA hydrolase                    | 0,282636293109528  |
| PADG_01564                                             | Methylmalonate-semialdehyde dehydrogenase            | 0,636197257251736  |
| PADG_08464                                             | Maleylacetoacetate isomerase                         | *                  |
| PADG_03964                                             | FAA_hydrolase domain-containing protein              | *                  |
| PADG_04142                                             | FAA_hydrolase domain-containing protein              | *                  |
| PADG_01032                                             | Aminoacylproline aminopeptidase                      | *                  |
| <b>1.2 Lipid, fatty acid and isoprenoid metabolism</b> |                                                      |                    |
| PADG_11311                                             | Glycerol kinase                                      | *                  |
| PADG_00255                                             | PKS_AT domain-containing protein                     | *                  |
| PADG_00254                                             | Fatty acid synthase subunit alpha                    | *                  |
| PADG_06155                                             | Palmitoyl-protein hydrolase 1                        | *                  |
| PADG_08651                                             | Peroxisomal hydratase-dehydrogenase-epimerase        | *                  |

|                                                      |                                                  |                    |
|------------------------------------------------------|--------------------------------------------------|--------------------|
| PADG_02751                                           | Acetyl-CoA C-acetyltransferase                   | 0,614730192049572  |
| PADG_02244                                           | (R)-benzylsuccinyl-CoA dehydrogenase             | 0,604582759412305  |
| PADG_12125                                           | Phytanoyl-CoA dioxygenase                        | *                  |
| <b>1.3 C- compound metabolism</b>                    |                                                  |                    |
| PADG_02145                                           | Alpha-1,4 glucan phosphorylase                   | 0,0453286197460781 |
| PADG_07435                                           | Sorbitol utilization protein SOU2                | 0,139206555057769  |
| PADG_05778                                           | Glycogen synthase                                | 0,224937012948966  |
| PADG_06165                                           | GLTP domain-containing protein                   | 0,465220165922144  |
| PADG_12426                                           | 1,4- $\alpha$ glucan branching enzyme            | *                  |
| PADG_00222                                           | UDP-galactopyranose mutase                       | *                  |
| PADG_01677                                           | Acetyl-coenzyme A synthetase                     | *                  |
| PADG_02733                                           | D-lactate dehydrogenase                          | *                  |
| PADG_04374                                           | UTP--glucose-1-phosphate uridylyltransferase     | *                  |
| PADG_06731                                           | Aldehyde reductase                               | *                  |
| <b>1.4 Nucleotide metabolism and cycle cellular</b>  |                                                  |                    |
| PADG_00824                                           | HABP4_PAI-RBP1 domain-containing protein         | 0,0704061470911087 |
| PADG_01867                                           | HMG box domain-containing protein                | 0,110961481334786  |
| PADG_04312                                           | UDP-N-acetylglucosamine pyrophosphorylase        | 0,150083257060309  |
| PADG_05893                                           | Histone chaperone NAP1                           | 0,153988672968819  |
|                                                      | S-adenosyl-L-methionine-dependent                |                    |
| PADG_01488                                           | methyltransferase                                | 0,390339474075175  |
| PADG_04934                                           | RNP domain protein                               | 0,436574036998478  |
| PADG_02683                                           | UV excision repair protein RAD23                 | 0,539720930232558  |
| PADG_05474                                           | Nudix hydrolase domain-containing protein        | 0,312850610474709  |
| PADG_01100                                           | Uracil phosphoribosyltransferase                 | 0,645519326279421  |
| PADG_07782                                           | Deoxyuridine 5'-triphosphate nucleotidohydrolase | 0,633967035713761  |
| PADG_01100                                           | Uracil phosphoribosyltransferase                 | 0,645519326279421  |
| PADG_00832                                           | Adenylosuccinate synthetase                      | 0,572224326552439  |
| PADG_05683                                           | Cell division control protein 48                 | 0,513960800262792  |
| PADG_00026                                           | Cytidine deaminase                               | *                  |
| PADG_00604                                           | Phosphoacetylglucosamine mutase                  | *                  |
| PADG_11857                                           | Mitotic checkpoint protein BUB3                  | *                  |
| PADG_07670                                           | SAP domain-containing protein                    | *                  |
| PADG_08483                                           | Chromo domain-containing protein                 | *                  |
| <b>1.5 Vitamins, cofactors and prosthetic groups</b> |                                                  |                    |
| PADG_00607                                           | Riboflavin synthase, $\alpha$ subunit            | 0,476773998944273  |
| PADG_08480                                           | RING-type domain-containing protein              | 0,115084887280824  |
| PADG_04869                                           | HIT domain-containing protein                    | 0,46638824190828   |
| PADG_03859                                           | Protein BchC                                     | 0,645910765039269  |
| <b>1.6 Secondary metabolism</b>                      |                                                  |                    |
| PADG_04687                                           | 3- $\beta$ -hydroxysteroid dehydrogenase         | 0,133756418951652  |
| PADG_03983                                           | 6,7-dimethyl-8-ribityllumazine synthase          | 0,446650011355894  |
| PADG_03221                                           | Mitochondrial intermediate peptidase             | 0,643905210551284  |
| <b>2. Energy</b>                                     |                                                  |                    |
| <b>2. 1 Glycolysis and gluconeogenesis</b>           |                                                  |                    |
| PADG_03813                                           | Hexokinase                                       | 0,185152910909166  |
| PADG_07950                                           | Hexokinase                                       | 0,329091922736366  |
| PADG_00451                                           | Glucose-6-phosphate isomerase                    | 0,488844478145202  |

|                                       |                                                      |                   |
|---------------------------------------|------------------------------------------------------|-------------------|
| PADG_03118                            | Glucose-6-phosphate 1-epimerase                      | 0,626097907868023 |
| PADG_00192                            | ATP-dependent 6-phosphofructokinase                  | *                 |
| PADG_02132                            | Mannose-6-phosphate isomerase                        | *                 |
| PADG_01361                            | Triosephosphate isomerase                            | *                 |
| PADG_04103                            | Pyruvate carboxylase                                 | 0,307074355179608 |
| PADG_00714                            | Pyruvate decarboxylase                               | 0,551030891727181 |
| <b>2.2 Pentose-phosphate pathway</b>  |                                                      |                   |
| PADG_03651                            | 6-phosphogluconate dehydrogenase                     | 0,283805619419591 |
| PADG_07606                            | D-xylose reductase                                   | 0,596690331608745 |
| PADG_04604                            | Transketolase                                        | 0,621460780673835 |
| PADG_07771                            | 6-phosphogluconolactonase                            | 0,56169953242529  |
| <b>2.3 Tricarboxylic-acid pathway</b> |                                                      |                   |
| PADG_02063                            | Pyruvate dehydrogenase E1 component, alpha subunit   | 0,376318795779854 |
| PADG_01762                            | $\alpha$ -ketoglutarate dehydrogenase E1 component   | 0,641457466924804 |
| PADG_02805                            | Isocitrate dehydrogenase subunit, mitochondrial      | *                 |
| PADG_03977                            | Isocitrate dehydrogenase subunit, mitochondrial      | *                 |
| PADG_03058                            | Succinate-semialdehyde dehydrogenase                 | *                 |
| PADG_04994                            | ATP citrate synthase                                 | *                 |
| <b>2.4 Electron transport chain</b>   |                                                      |                   |
| PADG_00688                            | F-type H <sup>+</sup> -transporting ATPase subunit H | 0,281718664477285 |
| PADG_11981                            | H <sup>+</sup> -transporting two-sector ATPase       | *                 |
| PADG_06956                            | Vacuolar proton pump subunit B                       | *                 |
| PADG_08394                            | Ubiquinol-cytochrome-c reductase subunit 2           | 0,195772768766238 |
| PADG_07081                            | Electron transfer flavoprotein subunit alpha         | *                 |
| PADG_11468                            | NADPH-dependent diflavin oxidoreductase 1            | *                 |
| PADG_11513                            | NADH-ubiquinone oxidoreductase                       | *                 |
| PADG_04559                            | Cytochrome b5 heme-binding domain-containing protein | *                 |
| PADG_07813                            | ATP synthase subunit gamma                           | 0,24766215039333  |
| PADG_04729                            | ATP synthase subunit d, mitochondrial                | *                 |
| PADG_11789                            | NAD(P)-bd_dom domain-containing protein              | *                 |
| PADG_00366                            | NAD(P)-bd_dom domain-containing protein              | 0,368110387121502 |
| <b>3. Protein metabolism</b>          |                                                      |                   |
| PADG_03595                            | Xaa-Pro aminopeptidase                               | 0,406301824212272 |
| PADG_03965                            | Proteasome subunit beta                              | 0,637760546347016 |
| PADG_11319                            | Ubiquitin-conjugating enzyme variant MMS2            | *                 |
| PADG_01051                            | Alpha-1,2-Mannosidase                                | *                 |
| PADG_02637                            | E2 ubiquitin-conjugating enzyme                      | *                 |
| PADG_04092                            | Peptidyl-prolyl cis-trans isomerase                  | 0,205696711785005 |
| PADG_01852                            | Hsc70 cochaperone                                    | *                 |
| PADG_02761                            | Hsp75                                                | *                 |
| PADG_02030                            | Hsp90                                                | 0,30587494273935  |
| PADG_07715                            | Hsp90                                                | 0,426675376497635 |
| PADG_04379                            | Hsp90 cochaperone STI1                               | 0,644249053457212 |
| PADG_04056                            | 14-3-3                                               | 0,442636844174566 |
| PADG_04440                            | 14-3-3                                               | 0,4923549696451   |
| PADG_12323                            | Peptidyl-prolyl cis-trans isomerase                  | 0,485890481725429 |
| PADG_02206                            | J domain-containing protein                          | *                 |

|            |                    |   |
|------------|--------------------|---|
| PADG_04242 | Sulfhydryl oxidase | * |
| PADG_08484 | CCT-epsilon        | * |
| PADG_00828 | Peroxin-19         | * |

#### 4. Cell rescue, defense and virulence

|            |                                               |                   |
|------------|-----------------------------------------------|-------------------|
| PADG_06740 | Aldedh domain-containing protein              | 0,208358055773826 |
| PADG_07699 | S-formylglutathione hydrolase                 | 0,245773468040818 |
| PADG_02048 | Nitroreductase domain-containing protein      | 0,350565428109855 |
| PADG_03163 | Cytochrome c peroxidase, mitochondrial        | 0,371533366499859 |
| PADG_01486 | Gluconate 5-dehydrogenase                     | 0,408193243022686 |
| PADG_07508 | Phosphatidylinositol transfer protein SFH5    | 0,586649163577017 |
| PADG_03161 | Thioredoxin                                   | *                 |
| PADG_03095 | Thioredoxin                                   | 0,596719735656353 |
| PADG_00324 | Catalase                                      | *                 |
| PADG_01626 | Ferroxidase                                   | *                 |
| PADG_11426 | Cytochrome P450                               | *                 |
| PADG_03276 | S-(hydroxymethyl)glutathione dehydrogenase    | *                 |
| PADG_06273 | Calcineurin regulatory subunit                | *                 |
| PADG_06221 | Formate dehydrogenase                         | *                 |
| PADG_11347 | Cytotoxic granule associated RNA protein TIA1 | *                 |

#### 5. Translation

|            |                                             |                   |
|------------|---------------------------------------------|-------------------|
| PADG_00692 | Elongation factor 1-alpha                   | 0,511310514955288 |
| PADG_01949 | Elongation factor Tu                        | 0,301383004236949 |
| PADG_02896 | EF1_GNE domain-containing protein           | 0,57469774398604  |
| PADG_04057 | Translation initiation factor 3 subunit J   | 0,320033042128714 |
| PADG_06110 | Translation machinery-associated protein 22 | 0,427457529375015 |
| PADG_06249 | Glutamine--tRNA ligase                      | 0,454072951149336 |
| PADG_01558 | Histidine--tRNA ligase                      | 0,329919143684326 |
| PADG_07884 | Polyadenylate-binding protein               | 0,446443683118585 |

#### 6. Biogenesis of cellular components

|            |                                             |                   |
|------------|---------------------------------------------|-------------------|
| PADG_07733 | Arp2/3 complex 34 kDa subunit               | *                 |
| PADG_08724 | RPEL repeat protein                         | 0,42800296956199  |
| PADG_00128 | Tubulin $\alpha$ -chain                     | *                 |
| PADG_05239 | Tubulin-specific chaperone A                | 0,565254417713434 |
| PADG_03959 | Actin-related protein 2/3 complex subunit 1 | *                 |
| PADG_07930 | Actin-related protein 2/3 complex subunit 4 | *                 |
| PADG_00945 | Actin-related protein 2/3 complex subunit 5 | *                 |
| PADG_08368 | Actin-depolymerizing factor 1               | *                 |

#### 7. Transport routes

|            |                                                |                   |
|------------|------------------------------------------------|-------------------|
| PADG_06033 | NIPSNAP family protein                         | 0,092493833285102 |
| PADG_03274 | Mitochondrial import translocase subunit tim9  | 0,31901610687976  |
| PADG_05884 | Mitochondrial import translocase subunit tim10 | 0,329471182412359 |
| PADG_05517 | Rho GDP-dissociation inhibitor                 | 0,381993569131833 |
| PADG_02652 | Grp1p                                          | 0,630514795921937 |
| PADG_01243 | Rab GDP dissociation inhibitor                 | 0,520096744230932 |
| PADG_00187 | V-SNARE coiled-coil domain-containing protein  | *                 |
| PADG_00282 | GTP-binding protein ypt2                       | *                 |
| PADG_00442 | Arf-GAP domain-containing protein              | *                 |
| PADG_03475 | ADP-ribosylation factor 6                      | *                 |

|                                |                           |                   |
|--------------------------------|---------------------------|-------------------|
| PADG_02833                     | ADP-ribosylation factor   | *                 |
| <b>8. Ribosomal metabolism</b> |                           |                   |
| PADG_00784                     | 40S ribosomal protein S0  | 0,48483292248699  |
| PADG_06525                     | 40S ribosomal protein S1  | 0,275149190110827 |
| PADG_08602                     | 40S ribosomal protein S2  | 0,658186428892797 |
| PADG_01654                     | 40S ribosomal protein S6  | 0,15691386784739  |
| PADG_00942                     | 40S ribosomal protein S7  | 0,347577683204104 |
| PADG_07685                     | 40S ribosomal protein S13 | 0,350470929820834 |
| PADG_06313                     | 40S ribosomal protein S18 | 0,519511967961255 |
| PADG_06599                     | 40S ribosomal protein S25 | 0,39712304135628  |
| PADG_08605                     | 40S ribosomal protein S28 | 0,416172186859424 |
| PADG_11379                     | 60S ribosomal protein L5  | 0,621062777898697 |
| PADG_07803                     | 60S ribosomal protein L12 | 0,422318438588777 |
| PADG_03325                     | 60S ribosomal protein L21 | 0,30275764797432  |
| <b>9. Hypothetical protein</b> |                           |                   |
| PADG_00211                     | Hypothetical protein      | 0,222384631447066 |
| PADG_12256                     | Hypothetical protein      | *                 |
| PADG_11657                     | Hypothetical protein      | *                 |
| PADG_11480                     | Hypothetical protein      | *                 |
| PADG_11588                     | Hypothetical protein      | *                 |

---

\*Indicates that the protein is expressed specifically in the down-regulation condition
